# Supplementary material for: Effect of adding milk to black tea on vascular function in healthy men and women: a randomised controlled crossover trial
Source: Royal Society of Chemistry journal article supplement (doi:10.1039/c8fo01019f), 2018-01-01
Supplement: c8fo01019f1.pdf [file c8fo01019f1.pdf]

**Supplemental Table 1:** Urinary phenolic metabolite profiles following consumption of black tea, black tea with milk and hot water. “ND” indicated that the metabolite was not detectable.

| Metabolite categories                                                                                           | Full chemical names                         | Treatments (µM) |                  |           |
|-----------------------------------------------------------------------------------------------------------------|---------------------------------------------|-----------------|------------------|-----------|
|                                                                                                                 |                                             | Black tea       | Black tea + milk | Hot water |
| Propionic acid<br>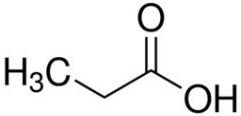             | 3-(3-Hydroxyphenyl)propionic acid           | 4.949           | 1.196            | 1.367     |
|                                                                                                                 | 3-(4-Hydroxyphenyl)propionic acid           | 4.831           | 1.061            | 1.310     |
|                                                                                                                 | 3-(4-Hydroxy-3-methoxyphenyl)propionic acid | 3.129           | 1.192            | 1.075     |
|                                                                                                                 | 3-(3,4-Dihydroxyphenyl)propionic acid       | 1.217           | 0.798            | 0.573     |
|                                                                                                                 | 3-(3,4,5-Trimethoxyphenyl)propionic acid    | 0.180           | 0.149            | 0.144     |
|                                                                                                                 | 3-(3-Methoxyphenyl)propionic acid           | 0.158           | 0.155            | 0.154     |
|                                                                                                                 | Subtotal                                    | 14.5            | 4.55             | 4.62      |
| Benzyl alcohol & aldehyde<br> | 2-Hydroxy-4-methoxybenzaldehyde             | 1.883           | 1.725            | 1.047     |
|                                                                                                                 | 4-Methylcatechol                            | 0.290           | 0.273            | 0.266     |
|                                                                                                                 | 1,2-Dihydroxybenzene                        | 0.152           | 0.127            | 0.128     |
|                                                                                                                 | 3,5-Dimethoxybenzyl alcohol                 | 0.110           | 0.094            | 0.095     |
|                                                                                                                 | 4-Hydroxy benzyl alcohol                    | 0.232           | 0.256            | ND        |
|                                                                                                                 | 3,4-Dimethoxybenzyl alcohol                 | 0.764           | 0.434            | 0.732     |
|                                                                                                                 | 3,5 Dihydroxybenzyl alcohol                 | 0.040           | 0.026            | 0.032     |
|                                                                                                                 | 4-Hydroxy-2-methoxybenzaldehyde             | 1.187           | 0.875            | 1.058     |
|                                                                                                                 | 3-Hydroxy benzyl alcohol                    | 3.819           | 11.127           | 6.576     |
|                                                                                                                 | 3,5-Dihydroxy benzaldehyde                  | 3.970           | 2.625            | 7.194     |
|                                                                                                                 | 3-Hydroxy-4-methoxybenzaldehyde             | 1.011           | 1.111            | 0.989     |
|                                                                                                                 | 2,6-Dimethoxyphenol                         | 0.262           | 0.285            | 0.241     |
|                                                                                                                 | 3,4,5-Trihydroxy benzaldehyde               | 0.179           | 0.178            | 0.164     |
|                                                                                                                 | 3,4,5-Trimethoxybenzaldehyde                | 0.029           | 0.029            | 0.027     |
|                                                                                                                 | 3,5-Dimethoxybenzaldehyde                   | 0.018           | 0.017            | 0.012     |
|                                                                                                                 | 3,4-Dimethoxybenzaldehyde                   | 0.007           | 0.007            | 0.005     |
|                                                                                                                 | 3-Hydroxybenzaldehyde                       | 0.005           | 0.002            | 0.000     |
|                                                                                                                 | Subtotal                                    | 13.96           | 19.19            | 18.57     |
| Benzoic acid<br>             | 4-Hydroxy-3-methoxybenzoic acid             | 15.224          | 12.309           | 11.583    |
|                                                                                                                 | 2,6-dihydroxy benzoic acid                  | 3.092           | 2.329            | 1.465     |
|                                                                                                                 | 4-methoxybenzoic acid-3-O-glucuronide       | 1.470           | 1.091            | 1.171     |
|                                                                                                                 | 2,5-dihydroxybenzoic acid                   | 1.155           | 0.840            | 0.768     |
|                                                                                                                 | 2-hydroxybenzoic acid                       | 0.405           | 0.206            | 0.194     |

|                                                                                     |                                              |        |        |        |
|-------------------------------------------------------------------------------------|----------------------------------------------|--------|--------|--------|
|                                                                                     | 3,5-dimethoxy benzoic acid                   | 0.120  | 0.030  | 0.105  |
|                                                                                     | 2-hydroxy-6-methoxybenzoic acid              | 0.129  | 0.038  | 0.082  |
|                                                                                     | 3,4-dihydroxybenzoic acid                    | 0.312  | 0.158  | 0.292  |
|                                                                                     | 3-methoxybenzoic acid-4-Oglucuronide         | 0.727  | 0.508  | 0.622  |
|                                                                                     | 3-methoxybenzoic acid                        | 0.060  | 0.033  | 0.048  |
|                                                                                     | 4-hydroxy-3,5-dimethoxybenzoic acid          | 0.090  | 0.040  | 0.062  |
|                                                                                     | 4-methoxybenzoic acid-3-sulfate              | 1.353  | 3.827  | 0.000  |
|                                                                                     | 3,4 dimethoxybenzoic acid                    | 1.235  | 1.435  | 0.004  |
|                                                                                     | 3-hydroxy-4-methoxybenzoic acid              | 0.604  | 0.604  | 0.489  |
|                                                                                     | 3,4,5-trihydroxybenzoic acid                 | 0.180  | 0.197  | 0.152  |
|                                                                                     | 4-hydroxybenzoic acid                        | 1.206  | 1.064  | 1.531  |
|                                                                                     | 4-hydroxy-3-methoxybenzoic acid methyl ester | 0.186  | 0.179  | 0.231  |
|                                                                                     | 4-hydroxybenzoic acid-4-sulfate              | 0.122  | 0.107  | 0.153  |
|                                                                                     | 2,4-dihydroxybenzoic acid                    | 0.372  | 0.332  | 0.323  |
|                                                                                     | 3,4-dihydroxybenzoic acid methyl ester       | 0.122  | 0.126  | 0.121  |
|                                                                                     | 3-hydroxybenzoic acid methyl ester           | 0.066  | 0.062  | 0.062  |
|                                                                                     | 2-hydroxy-4-methoxybenzoic acid              | 0.060  | 0.060  | 0.060  |
|                                                                                     | 4-hydroxy-3-methylbenzoic acid               | 0.052  | 0.049  | 0.047  |
|                                                                                     | 3-hydroxybenzoic acid                        | 0.047  | 0.030  | 0.049  |
|                                                                                     | Subtotal                                     | 28.39  | 25.65  | 19.62  |
| Phenylacetic acid                                                                   | 3-hydroxy-4-methoxyphenylacetic acid         | 9.676  | 8.111  | 8.358  |
| 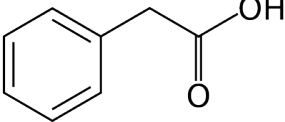 | 3-methoxyphenylacetic acid                   | 0.202  | 0.161  | ND     |
|                                                                                     | 4-hydroxy-3,5-dimethoxyphenylacetic acid     | 0.021  | 0.012  | 0.021  |
|                                                                                     | 3-hydroxyphenylacetic acid                   | 7.744  | 8.306  | 9.401  |
|                                                                                     | 4-hydroxyphenylacetic acid                   | 1.306  | 5.399  | 6.083  |
|                                                                                     | 3,4-dimethoxyphenylacetic acid               | 0.219  | 0.217  | 0.224  |
|                                                                                     | Subtotal                                     | 19.17  | 22.21  | 24.09  |
| Cinnamic acid                                                                       | 4-hydroxy-3-methoxycinnamic acid             | 0.467  | 0.361  | 0.367  |
|  | 3-hydroxy-4-methoxycinnamic acid             | 0.430  | 0.337  | 0.345  |
|                                                                                     | 3-hydroxycinnamic acid (trans)               | 0.428  | 0.231  | 0.186  |
|                                                                                     | 4-hydroxycinnamic acid                       | 0.326  | 0.283  | 0.274  |
|                                                                                     | 3,4-dihydroxy cinnamic acid                  | 0.117  | 0.082  | 0.071  |
|                                                                                     | 4-hydroxy-3,5-dimethoxycinnamic acid         | 0.610  | 0.483  | 0.561  |
|                                                                                     | 4-hydroxy-3,5-dimethoxycinnamic acid         | 0.586  | 0.462  | 0.541  |
|                                                                                     | 3-Methoxycinnamic acid                       | 1.608  | 1.606  | 1.608  |
|                                                                                     | 2-hydroxy cinnamic acid                      | 0.121  | 0.108  | 0.144  |
|                                                                                     | Rosmarinic acid                              | 0.299  | 0.299  | 0.299  |
|                                                                                     | Subtotal                                     | 4.69   | 3.95   | 4.10   |
|                                                                                     | Hippuric Acid                                | 276.2  | 211.2  | 168.9  |
|  | 3-hydroxyhippuric acid                       | 21.065 | 14.204 | 11.371 |

|  |                                   |       |       |        |
|--|-----------------------------------|-------|-------|--------|
|  | N-benzoylglutamic acid            | 0.241 | 0.154 | 0.161  |
|  | 3-methylhippuric acid             | 0.193 | 0.101 | 0.101  |
|  | 4-methylhippuric acid             | 0.114 | 0.042 | 0.034  |
|  | Methyl hippurate                  | 0.074 | 0.036 | 0.020  |
|  | 4-hydroxyhippuric acid            | 9.922 | 9.855 | 11.294 |
|  | Alpha Hydroxy Hippuric Acid       | 0.223 | 0.218 | 0.216  |
|  | 2,3,4-Trimethoxyphenylacetic acid | 0.035 | 0.035 | 0.036  |
|  | Subtotal                          | 308.1 | 235.8 | 192.1  |
